# Supplementary material
Source: HighWire-hosted journal article supplement (https://jnm.snmjournals.org/highwire/filestream/97618/field_highwire_adjunct_files/0/237230_Supplemental_Data.pdf)
Supplement: 237230_Supplemental_Data.pdf [file 237230_Supplemental_Data.pdf]

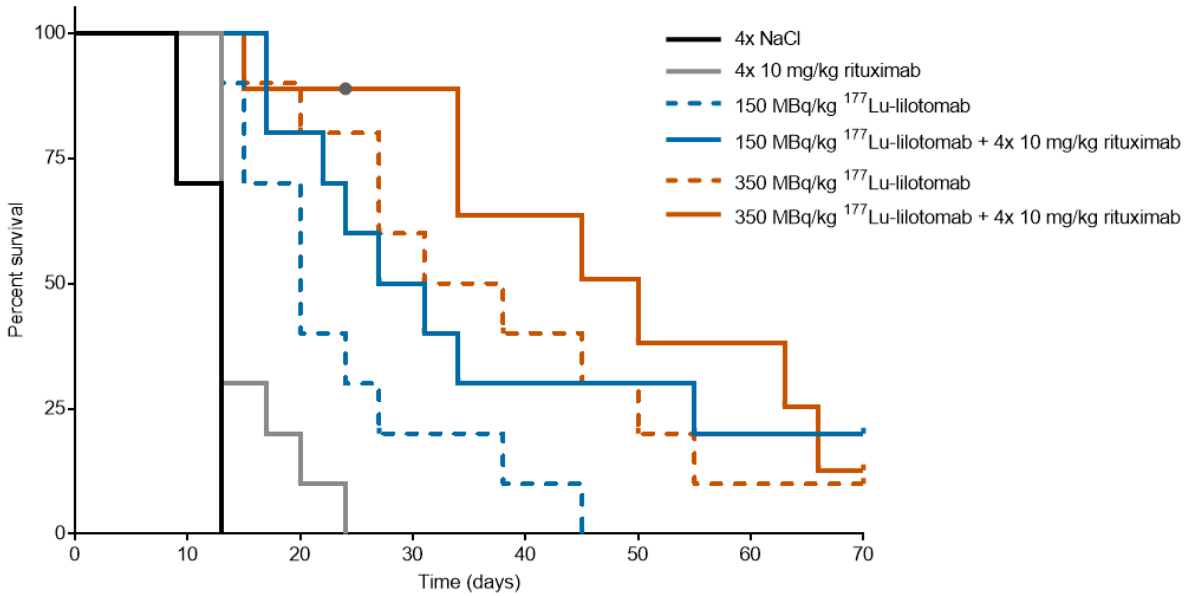

*Supplemental Fig.1 Kaplan-Meier survival curves of Raji2R-xenografted mice treated with saline, rituximab, 150 MBq/kg and 350 MBq/kg <sup>177</sup>Lu-lilotomab monotherapy or combination with rituximab. N=10. Gray dots: censored animals.*

*Supplemental Table 1 Median survival time of mice treated with NaCl, rituximab, 150 and 350MBq/kg <sup>177</sup>Lu-lilotomab and combination therapies.*

| Treatment Group                                   | Median survival ± SE<br>(days) |
|---------------------------------------------------|--------------------------------|
| 4×NaCl                                            | 13±0                           |
| 4×10mg/kg rituximab                               | 13±3                           |
| 150MBq/kg <sup>177</sup> Lu-lilotomab             | 20±3*,†                        |
| 350MBq/kg <sup>177</sup> Lu-lilotomab             | 38±9*,†                        |
| 150MBq/kg <sup>177</sup> Lu-lilotomab + rituximab | 27±6*,†                        |
| 350MBq/kg <sup>177</sup> Lu-lilotomab + rituximab | 50±7*,†                        |

\*Significantly different from NaCl (p<0.001)

†Significantly different from 4x10 mg/kg rituximab (p<0.01)

Supplemental Table 2 Bliss synergy interaction values

|                                                       | Interaction Value*<br>(90% confidence interval) | p-value |
|-------------------------------------------------------|-------------------------------------------------|---------|
| 150 MBq/kg <sup>177</sup> Lu-lilotomab +<br>rituximab | 0.7 (0.43-1.25)                                 | 0.54    |
| 350 MBq/kg <sup>177</sup> Lu-lilotomab +<br>rituximab | 1.58 (0.61-4.08)                                | 0.43    |

\*calculated using the hazards found through Cox Proportional Hazards model fitting to mouse survival.

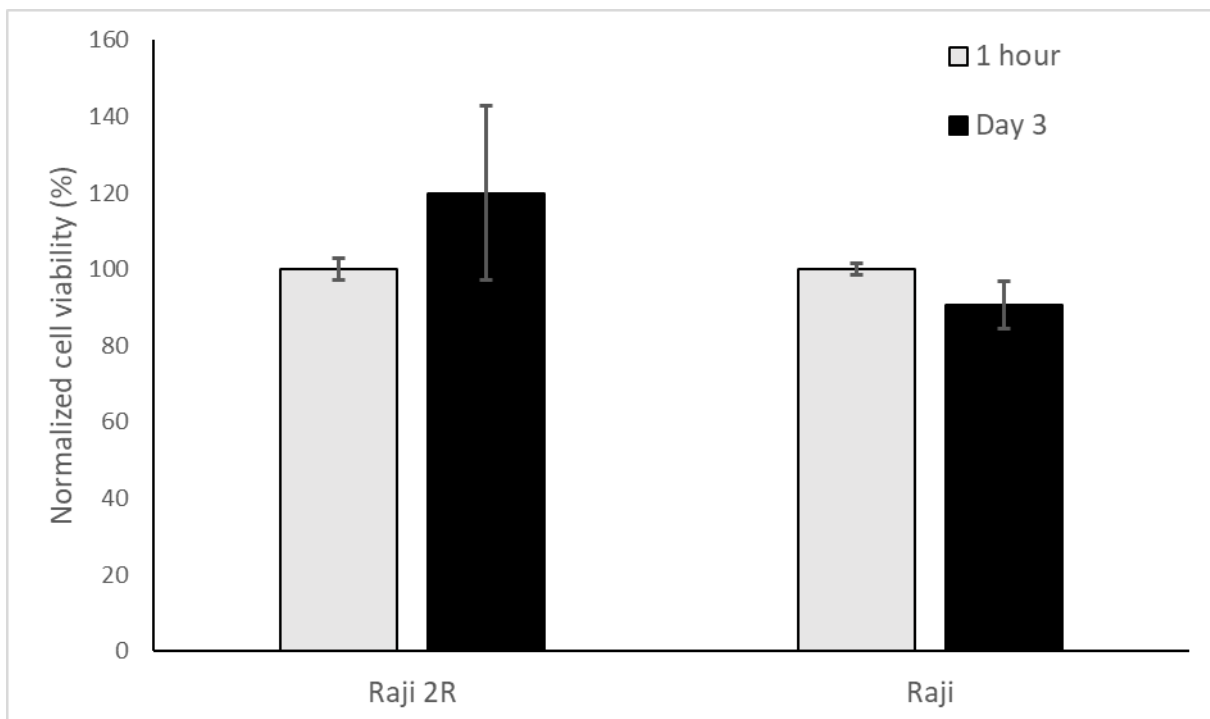

Supplemental Fig. 2 Effect of rituximab-treatment on viability in Raji and Raji2R cells. Mean  $\pm$ SD, N=2

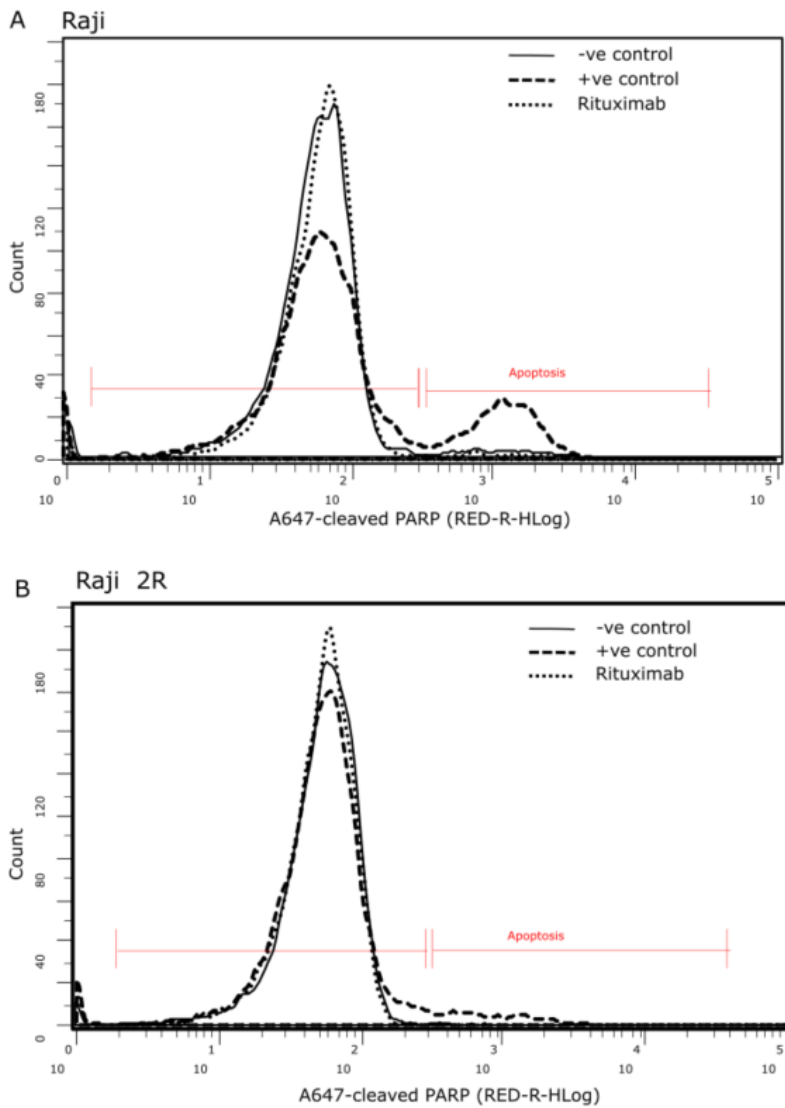

*Supplemental Fig.3 Example histograms showing the change in induction of apoptosis after treatment of Raji and Raji 2R cells with PBS as a negative control, etoposide as a positive control denoted as -ve and +ve control respectively or 50 $\mu$ g/ml rituximab.*
